# Supplementary material for: Multi-dimensional temperature sensitivity of protected tropical mountain rain forests
Source: Frontiers journal article supplement (doi:10.3389/ffgc.2023.1214911), 2024-01-09
Supplement: Table_1.docx [file Table_1.docx]

Supplementary Table 1. General circulation models (Coupled Model Intercomparison Project phase 6, CMIP-6) from which mean annual temperature data were downloaded from WorldClim 2, SSP 585 for the year 2070, for the evaluation of exposure to rising temperatures in the study area.

| Model number | Model name | Model number | Model name |
| --- | --- | --- | --- |
| 1 | ACCESS-CM2 | 13 | GISS-E2-1-G |
| 2 | ACCESS-ESMI-5 | 14 | GISS-E2-1-H |
| 3 | BCC-CSM2-MR | 15 | HadGEM3-GC31-LL |
| 4 | CanESM5 | 16 | INM-CM4-8 |
| 5 | CanESM5-CanOE | 17 | INM-CM5-0 |
| 6 | CMCC-ESM2 | 18 | IPSL-CM6A-LR |
| 7 | CNRM-CM6-1 | 19 | MIROC6 |
| 8 | CNRM-CM6-1-HR | 20 | MIROC-ES2L |
| 9 | CNRM-ESM2-1 | 21 | MPI-ESM1-2-HR |
| 10 | EC-Earth3-Veg | 22 | MPI-ESM1-2-LR |
| 11 | EC-Earth3-Veg-LR | 23 | MRI-ESM2-0 |
| 12 | FioESAM-2-0 | 24 | UKESM1-0-LL |
